|                                                                                                                     |      |                                                                                                                                                |      |
|---------------------------------------------------------------------------------------------------------------------|------|------------------------------------------------------------------------------------------------------------------------------------------------|------|
| Towards a convenient way to practice Medical Oncology                                                               | ii3  | Chronic lymphocytic leukemia: ESMO Clinical Recommendations for diagnosis, treatment and follow-up                                             | ii49 |
| Primary breast cancer: ESMO Clinical Recommendations for diagnosis, treatment and follow-up                         | ii5  | Chronic myelogenous leukemia: ESMO Clinical Recommendations for diagnosis, treatment and follow-up                                             | ii51 |
| Recurrent or metastatic breast cancer: ESMO Clinical Recommendations for diagnosis, treatment and follow-up         | ii9  | Hodgkin's disease: ESMO Clinical Recommendations for diagnosis, treatment and follow-up                                                        | ii53 |
| Epithelial ovarian carcinoma: ESMO Clinical Recommendations for diagnosis, treatment and follow-up                  | ii12 | Newly diagnosed large B-cell non-Hodgkin's lymphoma: ESMO Clinical Recommendations for diagnosis, treatment and follow-up                      | ii55 |
| Esophageal cancer: ESMO Clinical Recommendations for diagnosis, treatment and follow-up                             | ii15 | Relapsed large B-cell non-Hodgkin's lymphoma: ESMO Clinical Recommendations for diagnosis, treatment and follow-up                             | ii57 |
| Gastric cancer: ESMO Clinical Recommendations for diagnosis, treatment and follow-up                                | ii17 | Gastric marginal zone lymphoma of mucosa-associated lymphoid tissue type: ESMO Clinical Recommendations for diagnosis, treatment and follow-up | ii59 |
| Pancreatic cancer: ESMO Clinical Recommendations for diagnosis, treatment and follow-up                             | ii19 | Primary cutaneous lymphomas: ESMO Clinical Recommendations for diagnosis, treatment and follow-up                                              | ii61 |
| Colon cancer: ESMO Clinical Recommendations for diagnosis, adjuvant treatment and follow-up                         | ii21 | Newly diagnosed follicular lymphoma: ESMO Clinical Recommendations for diagnosis, treatment and follow-up                                      | ii63 |
| Rectal cancer: ESMO Clinical Recommendations for diagnosis, treatment and follow-up                                 | ii23 | Squamous cell carcinoma of the head and neck: ESMO Clinical Recommendations for diagnosis, treatment and follow-up                             | ii65 |
| Advanced colorectal cancer: ESMO Clinical Recommendations for diagnosis, treatment and follow-up                    | ii25 | Nasopharyngeal cancer: ESMO Clinical Recommendations for diagnosis, treatment and follow-up                                                    | ii67 |
| Gastrointestinal stromal tumors: ESMO Clinical Recommendations for diagnosis, treatment and follow-up               | ii27 | Malignant glioma: ESMO Clinical Recommendations for diagnosis, treatment and follow-up                                                         | ii69 |
| Non-small-cell lung cancer: ESMO Clinical Recommendations for diagnosis, treatment and follow-up                    | ii30 | Cutaneous malignant melanoma: ESMO Clinical Recommendations for diagnosis, treatment and follow-up                                             | ii71 |
| Small-cell lung cancer: ESMO Clinical Recommendations for diagnosis, treatment and follow-up                        | ii32 | Soft tissue sarcomas: ESMO Clinical Recommendations for diagnosis, treatment and follow-up                                                     | ii74 |
| Malignant pleural mesothelioma: ESMO Clinical Recommendations for diagnosis, treatment and follow-up                | ii34 | Osteosarcoma: ESMO Clinical Recommendations for diagnosis, treatment and follow-up                                                             | ii77 |
| Prostate cancer: ESMO Clinical Recommendations for diagnosis, treatment and follow-up                               | ii36 | Ewing's sarcoma of bone: ESMO Clinical Recommendations for diagnosis, treatment and follow-up                                                  | ii79 |
| Invasive bladder cancer: ESMO Clinical Recommendations for diagnosis, treatment and follow-up                       | ii38 | Cancers of unknown primary site: ESMO Clinical Recommendations for diagnosis, treatment and follow-up                                          | ii81 |
| Testicular seminoma: ESMO Clinical Recommendations for diagnosis, treatment and follow-up                           | ii40 | Chemotherapy-induced nausea and vomiting: ESMO Clinical Recommendations for prophylaxis                                                        | ii83 |
| Mixed or non-seminomatous germ-cell tumors: ESMO Clinical Recommendations for diagnosis, treatment and follow-up    | ii42 | Erythropoietins in cancer patients: ESMO Recommendations for use                                                                               | ii86 |
| Multiple myeloma: ESMO Clinical Recommendations for diagnosis, treatment and follow-up                              | ii44 | Hematopoietic growth factors: ESMO Recommendations for the application                                                                         | ii89 |
| Acute myeloblastic leukemia in adult patients: ESMO Clinical Recommendations for diagnosis, treatment and follow-up | ii47 | Management of cancer pain: ESMO Clinical Recommendations                                                                                       | ii92 |
